# Supplementary material
Source: publisher site journal article supplement (https://www.dovepress.com/article/333390)
Supplement: Supplementary file 1 [file get_supplementary_file.php]

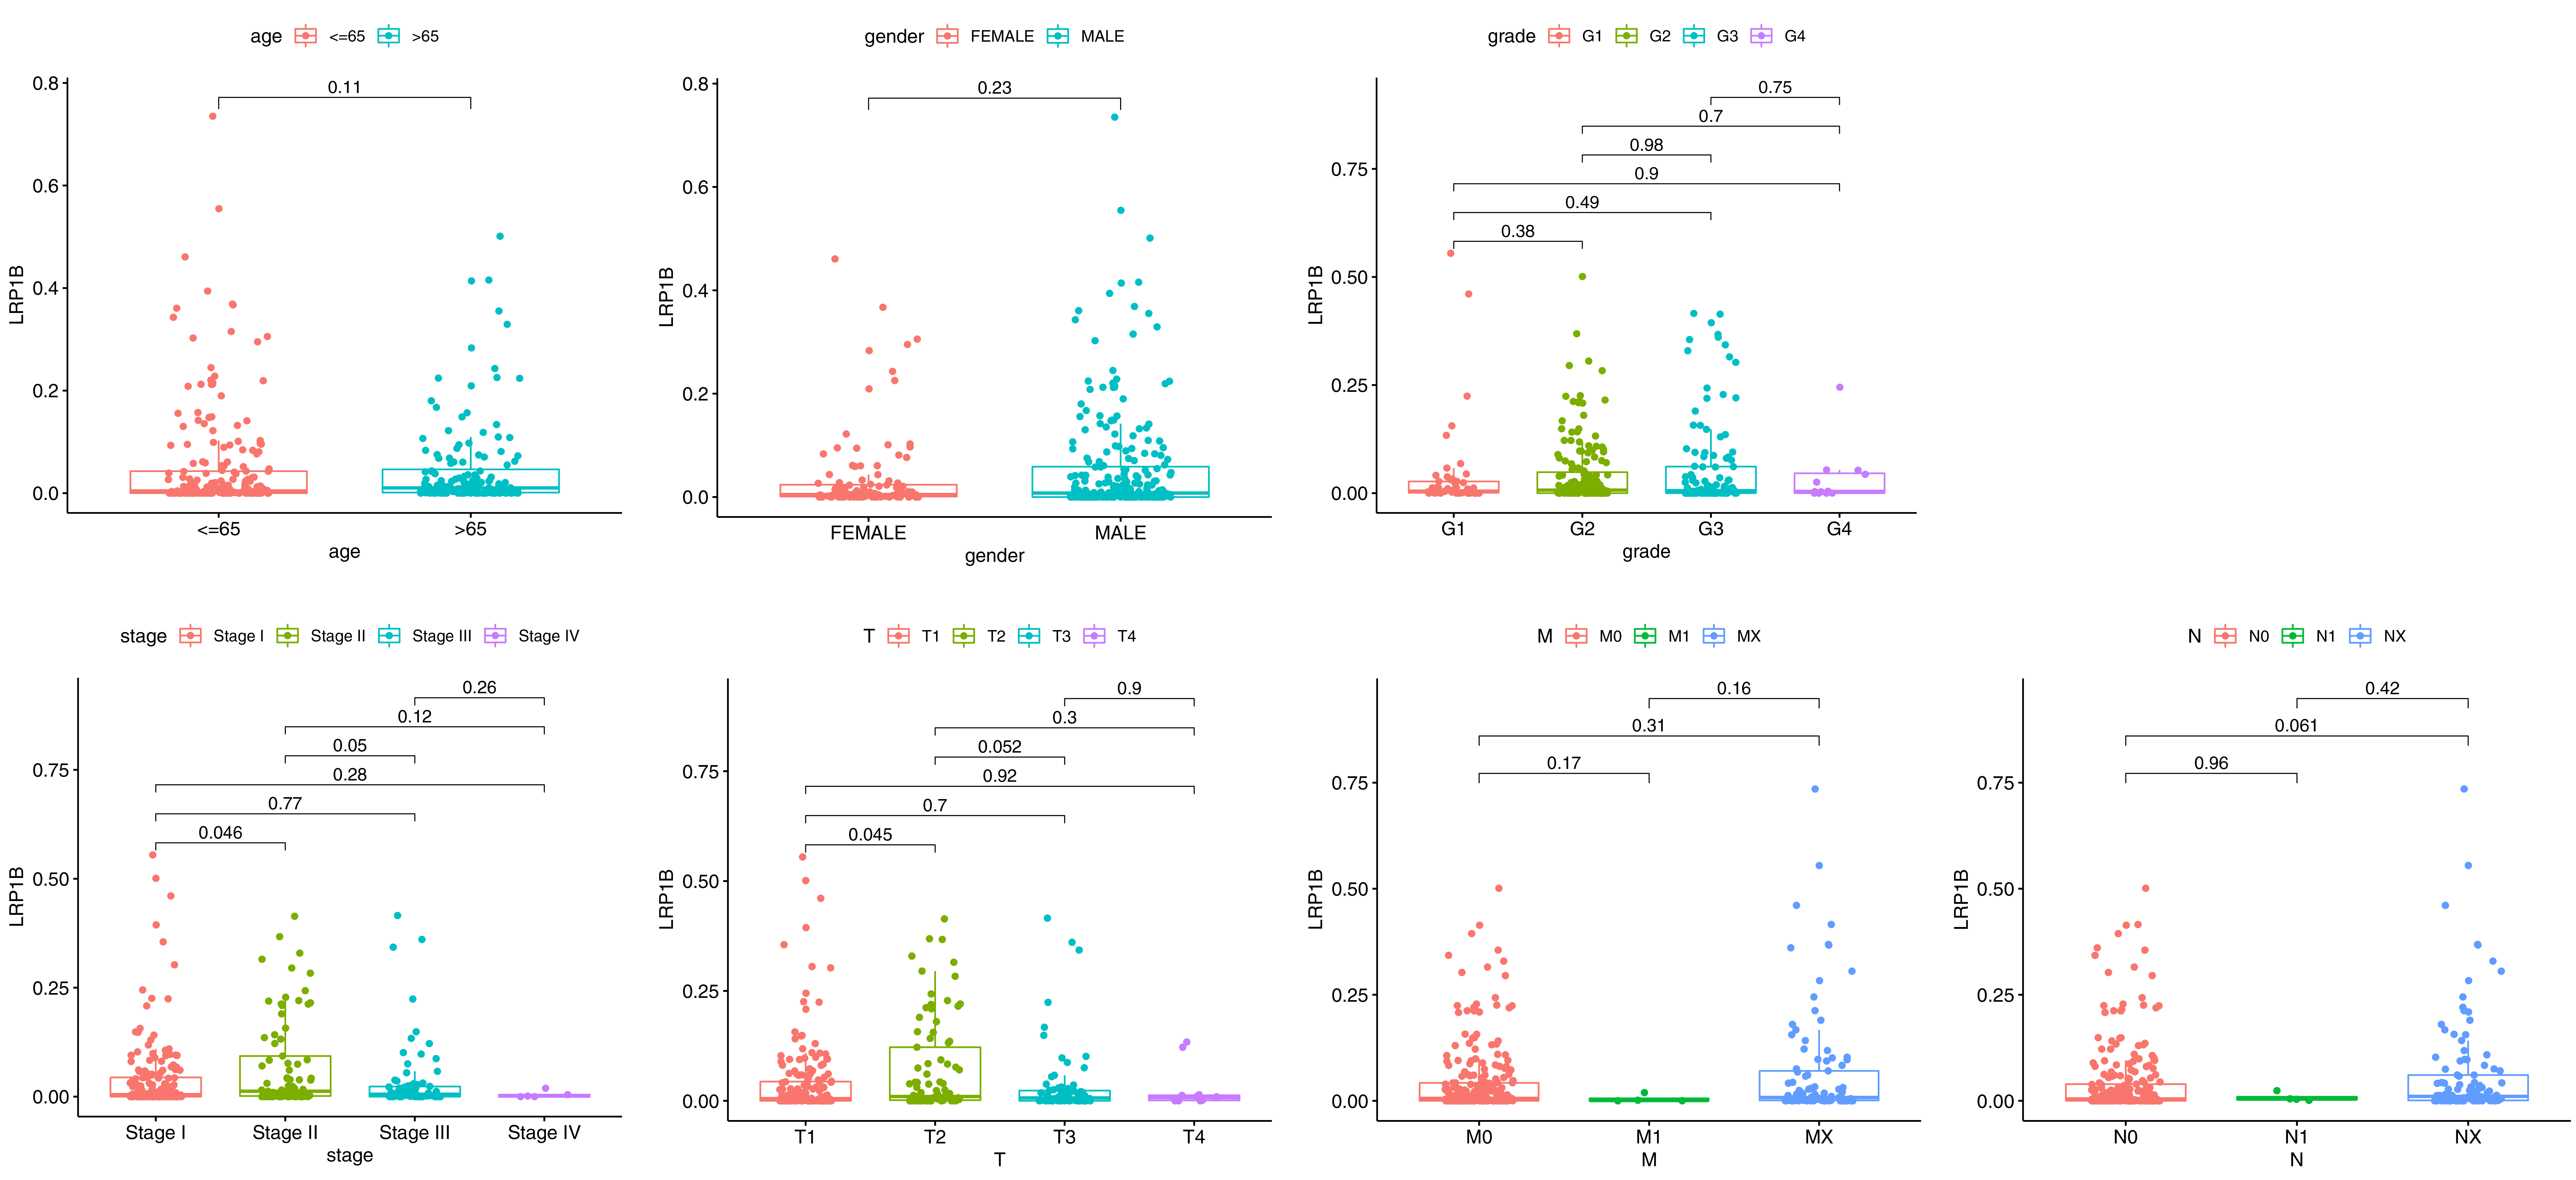


**Supplementary Figure 1** Associations between the expression level of LRP1B and clinical features in HCC. The Supplementary expression level of LRP1B was not significantly correlated with age, gender, grade, stage in HCC.
